# Supplementary material
Source: HighWire-hosted journal article supplement (https://bmjopen.bmj.com/content/9/3/e026016)
Supplement: inline-supplementary-material-1 [file inline-supplementary-material-1.pdf]

## Work-Sheet 1: BNA CAUSAL ANALYSIS (Sample)

LGA: XXXXXXXXXX

PERIOD: Quarter 1: 2016

| INTERVENTION                         | Identified BOTTLENECKS                                                                                         | WHY 1:<br>Immediate Causes<br>(Individual)                                                     | WHY 2:<br>Underlying Causes<br>(Community)                                                                       | WHY 3:<br>Structural Causes<br>(Policy)                       | WHY 4:<br>Management Weaknesses                             |
|--------------------------------------|----------------------------------------------------------------------------------------------------------------|------------------------------------------------------------------------------------------------|------------------------------------------------------------------------------------------------------------------|---------------------------------------------------------------|-------------------------------------------------------------|
| IMMUNIZATION<br>(supply side)        | Only 56% of population living within 5 km radius from immunization service points (HFs and outreach locations) | 44% of remaining population are living more than 5 km radius from immunization services points | Due to insecurity some of the communities are scattered and health facilities providing the services are closed. | No quick response from the policy makers on security matters. | Poor siting of some health facilities.                      |
| (demand side)                        |                                                                                                                |                                                                                                |                                                                                                                  |                                                               |                                                             |
| Childhood Illnesses<br>(supply side) | Only 10% of health workers trained in the management of childhood illnesses                                    | Inadequate scale up training to health personnel                                               | Lack of training of health personnel for long period                                                             | Lack of implementation of planned activities during the year. | Lack of follow up of planned activities and proper support. |

|                          |                                                                                           |                                                                           |                                                                       |                                                                     |                                                                        |
|--------------------------|-------------------------------------------------------------------------------------------|---------------------------------------------------------------------------|-----------------------------------------------------------------------|---------------------------------------------------------------------|------------------------------------------------------------------------|
| <b>(demand side)</b>     | Only 11% of children under the age of 5 years having fever and that were treated with ACT | poor management of ACT by the health workers                              | Insufficient health facilities providing ACT treatment across the LGA | Reduction of health facilities providing malaria services           | Lack of community mobilization                                         |
| <b>ANC (supply side)</b> | Only 12% of ANC service providers who have been trained in Focused Ante Natal Care        | Inadequate number of trained female staff to provide Focused ANC services | Inadequate Focused ANC services not reaching the community            | Lack of continuity on training of personnel on Focused ANC services | Poorly disposition of female staff                                     |
| <b>(demand side)</b>     | Only 50% of pregnant women who attended 4 ANC visits                                      | Poor attitude of health providers                                         | Inadequate sensitization to the community on Focused ANC              | Lack of proper distribution of free MCH items                       | Lack of closed supervision and financial support to the free MCH items |

|                                         |                                                                                                                     |                                                          |                                                         |                                                               |                                            |
|-----------------------------------------|---------------------------------------------------------------------------------------------------------------------|----------------------------------------------------------|---------------------------------------------------------|---------------------------------------------------------------|--------------------------------------------|
| <b>SBA &amp; CBNC<br/>(supply side)</b> | Only 6% of maternity staff trained in Basic Emergency Obstetric Care                                                | Lack of conducting step down training to other personnel | Lack of trained staff to cover the remaining facilities | Poor planning of number of personnel to be trained on BEOC    | Weak supportive supervision on the program |
| <b>(demand side)</b>                    | Only 0% of mother/infant pairs who received at least one follow up home visit within the first month after delivery | Lack of commitment from the health personnel             | Lack of community sensitization                         | Lack of planned documental schedules for follow up home visit | Weak supportive supervision on the program |

### Work-Sheet 2: IDENTIFYING SOLUTIONS & IMPLEMENTATION STRATEGIES

LGA XXXXXXXXXX

PERIOD: Quarter 1: 2016

| Identified BOTTLENECK                                                    | The WHY's<br>(WHY 1,2,3 & 4)                                                                                 | SOLUTIONS                                                         | IMPLEMENTATION STRATEGY               |
|--------------------------------------------------------------------------|--------------------------------------------------------------------------------------------------------------|-------------------------------------------------------------------|---------------------------------------|
| <b>(supply side)</b><br>Only 56% of population living within 5 km radius | <b>(WHY1)</b> 44% of remaining population are living more than 5 km radius from immunization services points | Outreach services should be extended to the remaining communities | Monitoring and supportive supervision |

|                                                                                                                   |                                                                                                                          |                                                                      |                                  |
|-------------------------------------------------------------------------------------------------------------------|--------------------------------------------------------------------------------------------------------------------------|----------------------------------------------------------------------|----------------------------------|
| from immunization service points (HFs and outreach locations)                                                     | (WHY 2) Due to insecurity some of the communities are scattered and health facilities providing the services are closed. | The community should be mobilize to visit the nearby facility        | Continues community mobilization |
|                                                                                                                   | (WHY 3) No quick response from the policy makers on security matters.                                                    |                                                                      |                                  |
| <b>(SUPPLY SIDE)</b><br>Only 10% of health workers trained in the management of childhood illnesses               | (WHY 4) Poor siting of some health facilities                                                                            | The community should be mobilize to visit the nearby facility        | Continues community mobilization |
|                                                                                                                   | (WHY 1) Inadequate scale up training to health personnel                                                                 | Scale up training of health personnel                                | Capacity building                |
|                                                                                                                   | (WHY 2) Lack of training of health personnel for long period                                                             | Scale up training of health personnel                                | Capacity building                |
|                                                                                                                   | (WHY 3) Lack of implementation of planned activities during the year.                                                    | Management should be follow up the planned activities                | Advocacy visit                   |
|                                                                                                                   | (WHY 4) Lack of follow up of planned activities and proper support.                                                      | Management should be follow up the planned activities                | Advocacy visit                   |
|                                                                                                                   | (WHY 1) poor management of ACT by the health workers                                                                     | To conduct Supportive supervision                                    | Supportive supervision           |
| <b>(DEMAND SIDE)</b><br>Only 11% of children under the age of 5 years having fever and that were treated with ACT | (WHY 2) Insufficient health facilities providing ACT treatment across the LGA                                            | To increase the number of health facilities providing ACT treatment. | Selection and training           |
|                                                                                                                   | (WHY 3) Reduction of health facilities providing malaria services                                                        | To increase the number of health facilities providing ACT treatment. | Selection and training           |

|                                                                                                                                                                                                         |                                                                                                                                                                  |                                                                                                                                                |                                                                                                                                               |
|---------------------------------------------------------------------------------------------------------------------------------------------------------------------------------------------------------|------------------------------------------------------------------------------------------------------------------------------------------------------------------|------------------------------------------------------------------------------------------------------------------------------------------------|-----------------------------------------------------------------------------------------------------------------------------------------------|
| <p><b>(SUPPLY SIDE)</b><br/>Only 12% of ANC service providers who have been trained in Focused Ante Natal Care</p> <p><b>(DEMAND SIDE)</b><br/>Only 50% of pregnant women who attended 4 ANC visits</p> | <p><b>(WHY 4)</b> Lack of community mobilization</p>                                                                                                             | The community should be mobilize                                                                                                               | Mobilization & sensitization                                                                                                                  |
|                                                                                                                                                                                                         | <p><b>(WHY 1)</b> Inadequate number of trained female staff to provide Focused ANC services</p>                                                                  | Training of female staff to provide focused ANC services                                                                                       | Capacity building                                                                                                                             |
|                                                                                                                                                                                                         | <p><b>(WHY 2)</b> Inadequate Focused ANC services not reaching the community</p>                                                                                 | Focused ANC services should be extended to the on reach community                                                                              | Step down training                                                                                                                            |
|                                                                                                                                                                                                         | <p><b>(WHY 3)</b> Lack of continuity on training of personnel on Focused ANC services</p>                                                                        | Training of female staff to provide focused ANC services                                                                                       | Capacity building                                                                                                                             |
|                                                                                                                                                                                                         | <p><b>(WHY 4)</b> Poorly disposition of female staff</p>                                                                                                         | Proper position of female staff                                                                                                                | Posting and transfer                                                                                                                          |
|                                                                                                                                                                                                         | <p><b>(WHY 1)</b> Poor attitude of health providers</p>                                                                                                          | Conduct supportive supervision                                                                                                                 | supportive supervision                                                                                                                        |
|                                                                                                                                                                                                         | <p><b>(WHY 2)</b> Inadequate sensitization to the community on Focused ANC</p>                                                                                   | To conduct community sensitization and health talk                                                                                             | distribution of IEC materials and use of demand creators                                                                                      |
|                                                                                                                                                                                                         | <p><b>(WHY 3)</b> Lack of proper distribution of free MCH items</p> <p><b>(WHY 4)</b> Lack of closed supervision and financial support to the free MCH items</p> | <p>Proper distribution of free MCH items and effective supervision</p> <p>Strengthening supportive supervision sustainable release of fund</p> | <p>monitoring and supportive supervision &amp; record keeping</p> <p>monitoring and supportive supervision and loving for release of fund</p> |

|                                                                                                                                                     |                                                                                                                                                                                                                                                                                                                |                                                                                                                                                                                                                              |                                                                                                                                                                                   |
|-----------------------------------------------------------------------------------------------------------------------------------------------------|----------------------------------------------------------------------------------------------------------------------------------------------------------------------------------------------------------------------------------------------------------------------------------------------------------------|------------------------------------------------------------------------------------------------------------------------------------------------------------------------------------------------------------------------------|-----------------------------------------------------------------------------------------------------------------------------------------------------------------------------------|
| <p><b>(SUPPLY SIDE)</b><br/>Only 6% of maternity staff trained in Basic Emergency Obstetric Care</p>                                                | <p><b>(WHY 1)</b> Lack of conducting step down training to other personnel</p> <p><b>(WHY 2)</b> Lack of trained staff to cover the remaining facilities</p> <p><b>(WHY 3)</b> Poor planning of number of personnel to be trained on BEOC</p> <p><b>(WHY 4)</b> Weak supportive supervision on the program</p> | <p>Conduct step down training by the trained personnel</p> <p>Conduct step down training by the trained personnel</p> <p>To conduct LGA selection committee planning meeting</p> <p>Strengthening supportive supervision</p> | <p>capacity building</p> <p>capacity building</p> <p>selection and implementation</p> <p>monitoring &amp; supportive supervision</p>                                              |
| <p><b>(DEMAND SIDE)</b><br/>Only 0% of mother/infant pairs who received at least one follow up home visit within the first month after delivery</p> | <p><b>(WHY 1)</b> Lack of commitment from the health personnel</p> <p><b>(WHY 2)</b> Lack of community sensitization</p> <p><b>(WHY 3)</b> Lack of planned documental schedule for follow up home visit</p> <p><b>(WHY 4)</b> Weak supportive supervision on the program</p>                                   | <p>To conduct monitoring and supportive supervision</p> <p>To conduct community sensitization</p> <p>Provision of data tools</p> <p>Strengthening supportive supervision</p>                                                 | <p>monitoring &amp; supportive supervision</p> <p>proper documentation and reporting</p> <p>proper documentation and reporting</p> <p>monitoring &amp; supportive supervision</p> |

|  |  |  |  |
|--|--|--|--|
|  |  |  |  |
|--|--|--|--|

### Work-Sheet 3: LGA DATA-DRIVEN BNA OPERATIONAL PLAN (JUL 2016 – JUN 2017)

LGA [REDACTED]

**PERIOD: Quarter 1: 2016**[illegible]



### Work-Sheet 3: LGA DATA-DRIVEN BNA OPERATIONAL PLAN (JUL 2016 – JUN 2017)

**LGA:**

**PERIOD: Quarter 1: 2016**

| OUTPUTS                                                                                                                                          | STRATEGIES | ACTIVITIES | TIMELINE |   |   |   |   |   |   |   |   |   |   |   | RESPONSIBLE | PARTNERS | BUDGET |
|--------------------------------------------------------------------------------------------------------------------------------------------------|------------|------------|----------|---|---|---|---|---|---|---|---|---|---|---|-------------|----------|--------|
|                                                                                                                                                  |            |            | J        | A | S | O | N | D | J | F | M | A | M | J |             |          |        |
| TRACER INTERVENTION: Childhood Illnesses                                                                                                         |            |            |          |   |   |   |   |   |   |   |   |   |   |   |             |          |        |
| <b>OBJECTIVE:</b> To increase the Number of health workers trained in the management of childhood illnesses 10% in june 2016 to 20% by june 2017 |            |            |          |   |   |   |   |   |   |   |   |   |   |   |             |          |        |

|                                                                                                                                                                                                                                                                |                                       |                                                                                                 |   |   |   |   |   |   |   |   |   |   |   |   |   |           |                             |            |
|----------------------------------------------------------------------------------------------------------------------------------------------------------------------------------------------------------------------------------------------------------------|---------------------------------------|-------------------------------------------------------------------------------------------------|---|---|---|---|---|---|---|---|---|---|---|---|---|-----------|-----------------------------|------------|
| Number of health workers trained in the management of childhood illnesses increased from 10% in june 2016 to 20% by june 2017<br><br><b>(DEMAND SIDE)</b><br>Number of children under the age of 5 years having fever and that were treated with ACT increased | Advocacy visit                        | Organize 1 day advocacy visit to the LGA chairman for follow up to implement planned activities | X |   |   |   |   |   |   |   |   |   |   |   |   | DDPHC RH  | MNCH 2                      | STAFF TIME |
|                                                                                                                                                                                                                                                                | Capacity building                     | To conduct 1 day meeting to identified and select 11 new health facility for step down training |   | X |   |   |   |   |   |   |   |   |   |   |   | DDPHC RH  | MNCH 2                      | STAFF TIME |
|                                                                                                                                                                                                                                                                |                                       | To conduct 2 day step down training to 11 health workers                                        |   |   | X |   |   |   |   |   |   |   |   |   |   | DDPHC RH  | MNCH 2                      | N100,000   |
|                                                                                                                                                                                                                                                                | Selection and training                | To conduct 1 day meeting to identified and select 11 new health facility for step down training |   |   | X |   |   |   |   |   |   |   |   |   |   | D/CONTROL | SUNMAP/MALARIA CONTROL UNIT | STAFF TIME |
|                                                                                                                                                                                                                                                                | Monitoring and supportive supervision | Conduct monthly supportive supervision to the selected health facilities                        | X | X | X | X | X | X | X | X | X | X | X | X | X | D/CONTROL | SUNMAP/MALARIA CONTROL UNIT |            |





[illegible]

### Work-Sheet 3: LGA DATA-DRIVEN BNA OPERATIONAL PLAN (JUL 2016 – JUN 2017)

**PERIOD: Quarter 1: 2016**

| OUTPUTS                                                                                                                                   | STRATEGIES | ACTIVITIES | TIMELINE |   |   |   |   |   |   |   |   |   |   |   | RESPONSIBLE | PARTNERS | BUDGET |
|-------------------------------------------------------------------------------------------------------------------------------------------|------------|------------|----------|---|---|---|---|---|---|---|---|---|---|---|-------------|----------|--------|
|                                                                                                                                           |            |            | J        | A | S | O | N | D | J | F | M | A | M | J |             |          |        |
| TRACER INTERVENTION: SBA & CBNC                                                                                                           |            |            |          |   |   |   |   |   |   |   |   |   |   |   |             |          |        |
| <b>OBJECTIVE:</b> To increase the Number of maternity staff trained in Basic Emergency Obstetric Care 6% in june 2016 to 16% by june 2017 |            |            |          |   |   |   |   |   |   |   |   |   |   |   |             |          |        |

|                                                                                                                                                                 |                                    |                                                                                                                                                                 |   |   |   |   |   |   |   |   |   |   |   |   |   |           |        |            |
|-----------------------------------------------------------------------------------------------------------------------------------------------------------------|------------------------------------|-----------------------------------------------------------------------------------------------------------------------------------------------------------------|---|---|---|---|---|---|---|---|---|---|---|---|---|-----------|--------|------------|
| <b>(SUPPLY SIDE)</b><br>Number of maternity staff trained in Basic Emergency Obstetric Care increased from 6% in june to 16% in june 2017                       | capacity building                  | To conduct 1 day meeting to identified and select 11 new health facility for step down training<br><br>To conduct 2 day step down training to 11 health workers |   |   | X |   |   |   |   |   |   |   |   |   |   | DDPHCRH   | MNCH 2 | STAFF TIME |
|                                                                                                                                                                 |                                    |                                                                                                                                                                 |   |   |   |   |   |   |   |   |   |   |   |   |   | DDPHCRH   | MNCH 2 | N100,000   |
| <b>(DEMAND SIDE)</b><br>Number of mother/infant pairs who received at least one follow up home visit within the first month after delivery increased from 0% in | proper documentation and reporting | Provision of data tools to all health facility for proper documentation and reporting                                                                           | X | X | X | X | X | X | X | X | X | X | X | X | X | DDPHC M&E | MNCH 2 | STAFF TIME |

[illegible]
